# Supplementary material for: Atomic Magnetometer Achieves Visual Salience Analysis in Drosophila
Source: MDPI journal article supplement (doi:10.3390/s23031092), 2023-01-17
Supplement: s1 [file s1]

# Atomic magnetometer achieves visual salience analysis in *Drosophila*

Authors:

Fan Liu <sup>†</sup>, Dongmei Li <sup>†</sup>, Yixiao Li, Zhao Xiang, Yuhai Chen, Zhenyuan Xu, Qiang Lin, Yi Ruan <sup>\*</sup>

Zhejiang Provincial Key Laboratory and Collaborative Innovation Center for Quantum Precision Measurement, College of Science, Zhejiang University of Technology, Hangzhou 310023, China

\* Correspondence: yiruan@zjut.edu.cn

<sup>†</sup> These authors contributed equally to this work.

**This PDF file includes:**

Supplementary information Text

Figs. S1 to S4

### Spin exchange relaxation free atomic magnetometer (SERF AM):

A single-light spin exchange relaxation free atomic magnetometer(SERF AM) achieved  $20 \text{ fT} / \sqrt{\text{Hz}}$  before measuring, and the noise power spectral density described the sensitivity as shown in FIG.S1.

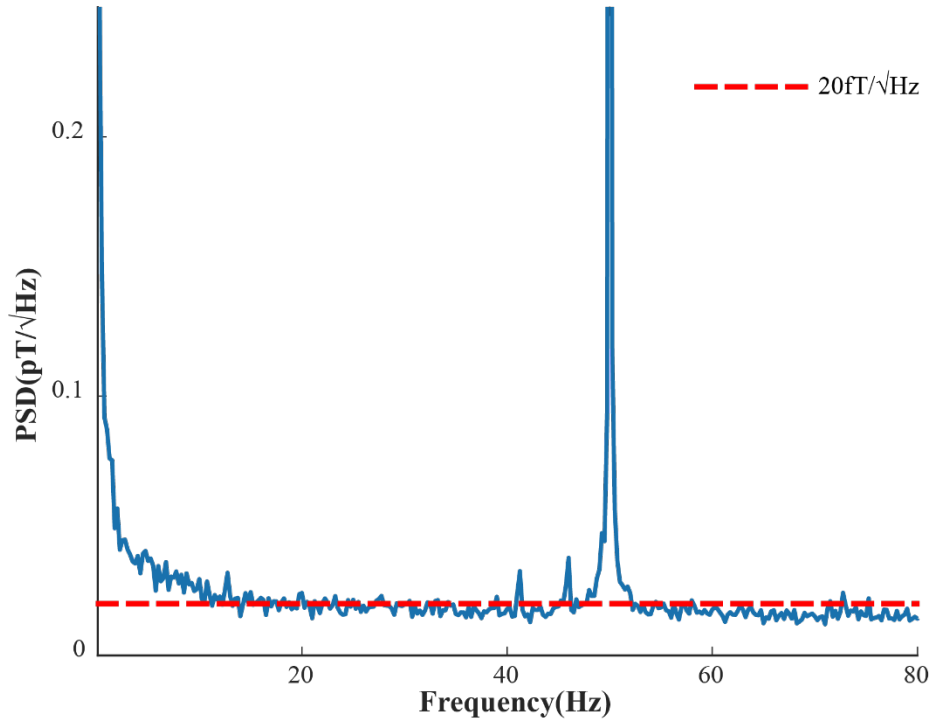

Figure S1: Sensitivity of SERF atomic magnetometer

Figure S2 shows that the PSD in the frequency range between 1 and 30 Hz was significantly increased under dead *Drosophila* condition compared with unloading in our measurements. It should be noted that such a raise of PSD under dead *drosophila* condition may be caused by the unconscious muscle movement of the body after the brain of the fruit fly dies.

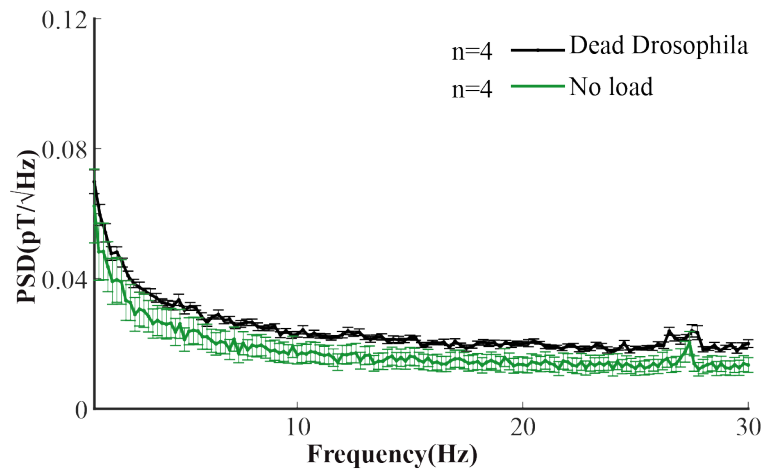

Figure S2: Power Spectral Density (PSD) between 1 - 30 Hz, dead flies (black line) and unloading (green line).

As indicated in Fig S3 and Fig S4, that 1 - 20 Hz and 30 - 80 response in the presence of stimulation have almost no change compared with that without stimulation  $p > 0.05$ ,  $n = 11$  flies.

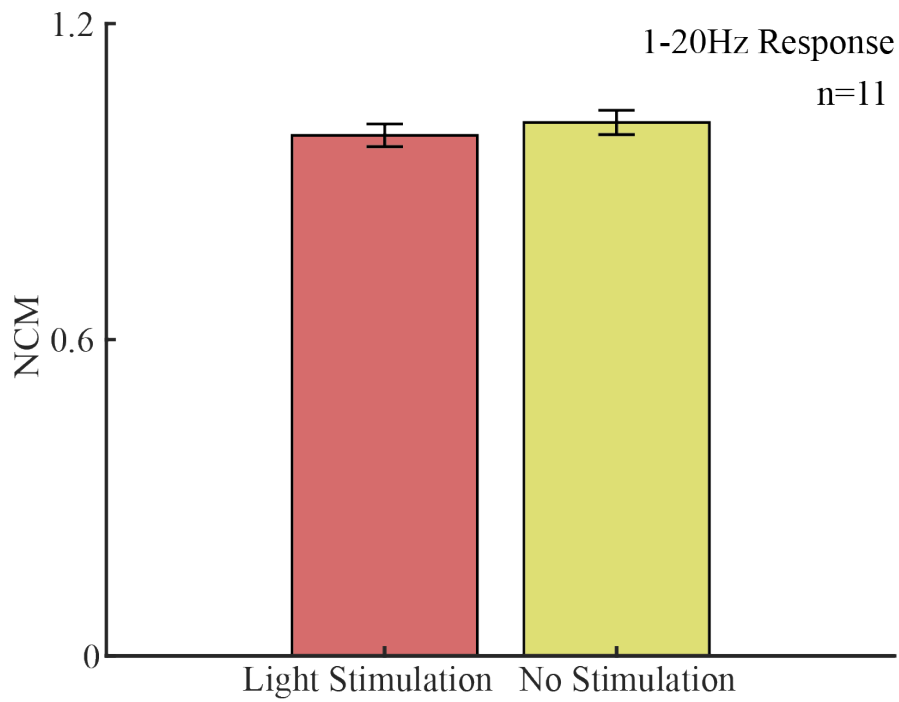

Figure S3: Average 1-20 Hz NCM ( $\pm$ SEM) : No Stimulation (yellow) , Light Stimulation (red).

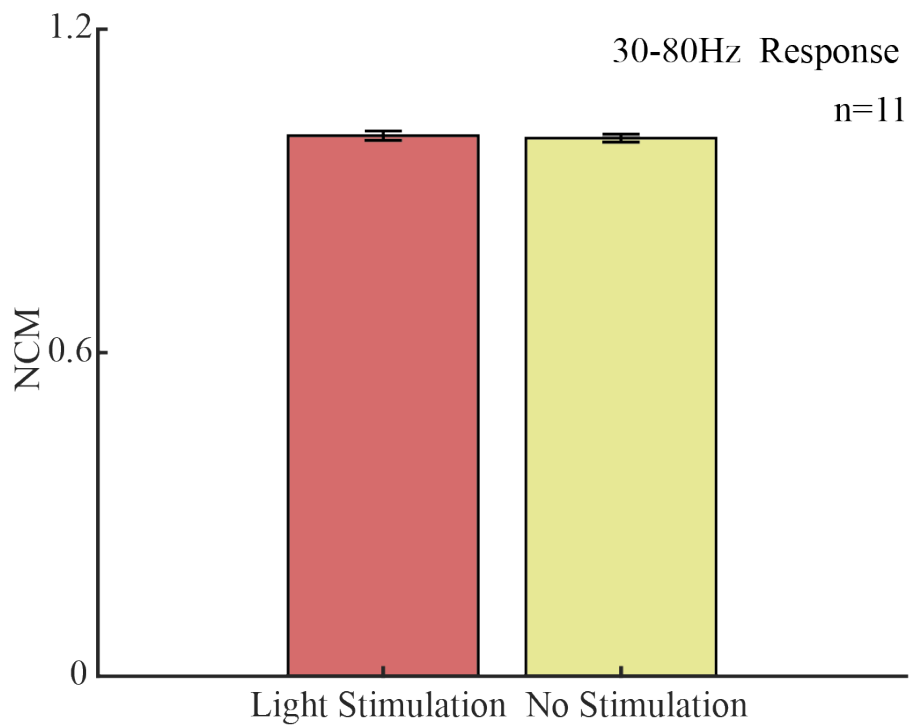

Figure S4: Average 30-80 Hz NCM ( $\pm$ SEM): No Stimulation (yellow),  
Light Stimulation (red).
